# Supplementary material
Source: Research Square preprint supplement (doi:10.21203/rs.3.rs-9181763/v1)
Supplement: Supplementary file 1 [file cebd1860b3491fb6ad982cce.xlsx]

## Sheet: Table S1
Table S1 Primers used for cloning of LkaGRF and LkaGIF gene family members in Larix kaempferi.
Gene	Forward primer	Reverse primer
LkaGRF1	CGTCATAAAACTTGCCCTTG	CCTTGCCAATGTTCAGAAGT
LkaGRF2	TGGAGGAAGAGGAGGTGG	CGGCATCAATCAAGCATT
LkaGRF3	AACGGAATCTTGTCATCCTG	ACCCTATTTGGCGTGAGAG
LkaGRF4	CCGTGGGTGTAGATGTGG	CAAACCGAATCAGAGTCCC
LkaGRF5	AACACACCACTGGCGGTAT	TATCGCCAATGGATTCCC
LkaGIF1	CGTCTACGCAAGCCACAC	AAAGCAAAGTCTTCACGAGG
LkaGIF2	GTAAACCTCTGCGTTCCCTA	GCCCAACTGCTATCAATCC
LkaGIF3	CATTTCAAAGGCAAGGCAAT	GACAAACTGACTATTGATGACCAAG

## Sheet: Table S2
Table S2 Predicted physicochemical characteristics of Lka-GRF and Lka-GIF proteins based on ProtParam analysis.
Sequence ID	Number of Amino Acid	Molecular Weight	Theoretical pI	Instability Index	Aliphatic Index	Grand Average of Hydropathicity	Predicted Location
LKGRF1	420	46931.8	9.38	52.74	60.4	-0.54	Nucleus
LKGRF2	711	76352.7	8.41	57.39	56.88	-0.563	Nucleus
LkGRF3	766	82869.3	8.96	57.95	60.23	-0.66	Nucleus
LKGRF4	597	64337.9	8.74	52.27	55.53	-0.707	Nucleus
LKGRF5	789	84644.6	8.94	51.16	57.29	-0.686	Nucleus
LKGIF1	248	26606.3	5.6	57.27	59.23	-0.752	Nucleus
LKGIF2	272	30129.8	6.12	64.64	52.83	-1.157	Nucleus
LKGIF3	270	29436.6	5.78	52.89	71.67	-0.566	Nucleus

## Sheet: Table S3
Table S3 Gene-specific primers used for RLM-RACE
Gene	GSP Inner primer	GSP Outer primer
LkaGRF1	TATTATTACGAGCACTAGCGGTTGAG	TACCACCACCTTCTGCTCCCG
LkaGRF2	GGCGGAATGATGATGATGAGGA	AGCGGCGGGAGATGCTACAC
LkaGRF3	GAAGCTGGGCGTGGTAGGAC	TTCTCCACCTTTCATCCCGTTC
LkaGRF4	GCTGCCAGACTGATAGAAGAAGG	CCGATCCAGGAGCGATTTGTAG
LkaGRF5	TCCCACCAAGGATTGAGCAGTA	TGTGGTTTTGCTGGGTATTGTTGAT

## Sheet: Table S4
Table S4 Primer sequences used for qRT-PCR analysis
Gene	Forward primer：	Reverse primer：
LkaGRF1	TGGGAGGAGAAGCGATGAACTAC	CCTGCCATTGAGACGGAGTGA
LkaGRF2	CGCAGAACGGATGGTAAGA	CGGAATGATGATGAGGAGGA
LkaGRF3	TCCACTTCCTCCTCAATCTCATCA	CGTCTGTTCTCCGACATCTTCC
LkaGRF4	GAGCCTGGAAGATGCCGAAGAAC	TGCATGTGCCGTTCGCAATACT
LkaGRF5	TAGTAGCCTTACCAGTTTGCG	AGACCTCCACCAGTCCCAGA
LkaGIF1	CCTCAGTCTCTGATGGCAGC	AAATTCAGGGAAGCCCCCAG
LkaGIF2	ATGCTACACAGTGAGGCAGG	TGCATGGTTTCTCCAGTGCT
LkaGIF3	TTCTTACGCTCGTCCTCCTC	ATTCCTCGCTTTCCGTCCAT
